1     **Prevalence and Characteristics of Cannabis-induced Toxicoses in Pets: Results from a**  
2                                     **Survey of Veterinarians in North America**

3

4     **Short Title:** Cannabis-induced Toxicoses in Pets

5

6     Richard **Quansah Amissah**<sup>1</sup>, Nadine A. **Vogt**<sup>2</sup>, Chyun **Chen**<sup>1</sup>, Karolina **Urban**<sup>3</sup>, Jibran  
7     **Khokhar**<sup>1\*</sup>

8

9

10    **Authors' affiliations:**

11    <sup>1</sup> Department of Biomedical Sciences, Ontario Veterinary College, University of Guelph,  
12    Guelph, Ontario, Canada

13    <sup>2</sup> Department of Population Medicine, Ontario Veterinary College, University of Guelph,  
14    Guelph, Ontario, Canada

15    <sup>3</sup> Avicanna Inc., Toronto, Canada

16

17    **\*Corresponding author:**

18    jkhokhar@uoguelph.ca

19

20

21

22

23

24

25

26

27

28

29 **ABSTRACT**

30 Cannabis legalization in North America has coincided with an increase in reports of cannabis-  
31 induced toxicosis in pets, but the magnitude of this problem, as well as outcomes of these  
32 incidents remain unknown. Therefore, we examined the frequency, diagnostic criteria, clinical  
33 signs, and prognoses of cannabis toxicoses in pets in North America. We conducted an online  
34 survey between January, 2021 and April, 2021 targeting veterinarians practicing in Canada and  
35 the United States (US). Out of the 251 study participants, 191 practiced in Canada. Cannabis  
36 toxicosis was most commonly reported in dogs (n=226 veterinarians), and the number of  
37 toxicosis cases increased significantly in Canada ( $p<0.0001$ ) and the US ( $p=0.002$ ) after  
38 October, 2018. Frequently reported clinical signs of cannabis toxicosis included: urinary  
39 incontinence (n=195), disorientation (n=182), ataxia (n=178), lethargy (n=150), hyperesthesia  
40 (n=134), and bradycardia (n=112). Edibles were most commonly suspected to be the cause of  
41 toxicosis (n=116). The most common route of exposure was ingestion (n=135), while the most  
42 cited reason was ingestion while unattended (n=135). Cannabis toxicosis was mostly diagnosed  
43 using supportive clinical signs (n=229), the most common treatment was outpatient monitoring  
44 (n=182), and pets were most often treated as out-patients (n=103). The legalization of cannabis  
45 use in Canada and the US is likely an important factor associated with the increased cannabis  
46 toxicosis cases in pets; however, the legal status may also increase reporting. The medicinal  
47 use of cannabis by pet-owners for pets may also contribute to a portion of the reported  
48 toxicoses. Most pets that experienced cannabis toxicosis recovered completely, suggesting that  
49 most cannabis toxicoses do not result in long-term ill effects. Even though some deaths (n=16)  
50 were reported in association with cannabis toxicosis, the presence of confounders such as  
51 toxins, and underlying conditions cannot be ruled out, emphasizing the need for rigorous  
52 controlled laboratory studies to investigate this important issue.

53

## 54 INTRODUCTION

55 With the widespread legislative changes legalizing cannabis across most of North America,  
56 cannabis has become the object of considerable public health and policy discussions (1). The  
57 increased accessibility to cannabis has prompted an increased interest for its therapeutic value  
58 in human and, more recently, veterinary medicine (2). In fact, the sales of cannabis products  
59 for pets have increased by 1000% between 2016 and 2017 and a survey found that 79.8% of  
60 Canadians have previously bought cannabis products for their dog(s) (3). Although research is  
61 ongoing, there are only a handful of published studies that examine the clinical use of cannabis  
62 in veterinary medicine, and even fewer have examined basic pharmacokinetic and toxicology  
63 data (4). Due to this, the education of veterinarians and pet owners is hindered, resulting in  
64 intentional or accidental cannabis exposure of pets without proper oversight or knowledge. In  
65 fact, a study in Colorado found a strong correlation between the number of registered medical  
66 cannabis cardholders and cases of cannabis toxicosis in dogs, with a 4-fold increase in reported  
67 cases between 2005 and 2010 (5). Additionally, over the past 6 years, there was a 448%  
68 increase in reports of cannabis poisoning cases in companion animals in the United States  
69 (USA) and Canada (6). The Animal Poison Control Center has also reported a 765% increase  
70 in calls regarding pets ingesting cannabis in 2019 compared to the previous year (ASPCA,  
71 2019). In Canada, as expected, the total number of cases reported are fewer than in the USA,  
72 but they have been increasing since 2018 according to the Canadian Veterinary Medical  
73 Association (CVMA, 2019).

74 Taken together, these data suggest that cases of cannabis toxicosis in companion animals are  
75 on the rise, warranting further investigations into these incidents. The aim of our study was to  
76 gather relevant information from veterinarians in clinical practice regarding cannabis  
77 toxicoses. More specifically, our objectives were: a) to examine veterinarian-reported trends in

78 the frequency of cannabis toxicoses pre- and post-legalization October 2018 (date of  
79 legalization in Canada); b) characterize diagnostic criteria used for cannabis toxicoses; c)  
80 characterize the clinical signs and prognoses of veterinary-reported cannabis toxicoses; d)  
81 identify any evidence supporting the lethality of cannabis in companion animals.

82

## 83 **MATERIALS AND METHODS**

84 To assess cannabis toxicosis in companion animals in both Canada and USA, we designed an  
85 online survey using Qualtrics (Provo, Utah, USA). Participants were practicing veterinarians  
86 in either Canada or the USA, who were treating pets, and had been presented with cases of  
87 cannabis toxicosis. The duration of the survey was from 28<sup>th</sup> January, 2021 to 30<sup>th</sup> April, 2021.  
88 Before launching the survey, it was pre-tested by the authors and their colleagues, and feedback  
89 on the content of the survey was obtained and incorporated into the final version. The Canadian  
90 Association of Veterinary Cannabinoid Medicine, Canadian Veterinary Medical Association,  
91 Alberta Veterinary Medical Association, Nova Scotia Veterinary Medical Association,  
92 Newfoundland and Labrador Veterinary Medical Association, and the Ontario Veterinary  
93 College supported with recruitment of participants by distributing the survey to their members.  
94 Participants were also encouraged to distribute the survey to their colleagues. The link to the  
95 survey was distributed via websites, regular e-newsletters, and magazines of the  
96 aforementioned associations. All the data were collected anonymously in Qualtrics. The need  
97 for approval by the Institutional Ethical Review Board was waived due to the nature of the  
98 survey questions being only about their veterinary practice, and no personal data were  
99 collected. Additionally, the data collected were anonymized and participants were informed on  
100 the first page of the survey questionnaire that completing the survey implied consent to  
101 participate. Except for questions related to consent to participate and eligibility to participate  
102 in the survey, participants could opt not to answer any question, and could decide whether to

103 complete the survey or not. Details of the online survey can be found in S1 File. We initially  
104 intended to compare the trends in toxicosis cases in Canada and the US; however, the number  
105 of US participants was too low for such a comparison to be made. Therefore, while we have  
106 described data obtained from veterinarians practicing in the USA in some instances, we have  
107 chosen to describe combined data from both Canada and the USA in cases where no differences  
108 were observed between the two countries.

109

## 110 **Statistical analysis**

111 At the end of the survey, the data were exported from Qualtrics to Microsoft Excel for analysis.  
112 All data were analyzed using libraries in Python (version 3.0). Since the data obtained were  
113 categorical, and therefore not normally distributed, non-parametric tests were used for analysis.  
114 Unless otherwise stated, the results reported represent the number of participants that  
115 responded to a specific question. Descriptive statistics were performed in Python. Comparison  
116 of the number of cannabis toxicosis cases pre- and post-legalization was performed using the  
117 Wilcoxon-signed rank test in Python. The number of pets treated according to hospital setting  
118 and practice type was analyzed using the Kruskal Wallis test followed by the Dunn's post-hoc  
119 test in Python. The Chi-squared Goodness of fit test was used to compare the frequencies of  
120 each clinical sign, and for clinical signs with significantly different frequencies, a post-hoc  
121 binomial pairwise test was conducted. Differences were considered statistically significant  
122 when the p-value was less than 0.05. Graphs were plotted using GraphPad Prism version 6.01  
123 (GraphPad Software Inc., La Jolla CA, USA).

124

## 125 **RESULTS**

### 126 **Demographics**

127 Out of the 251 participants who began the survey, a total of 222 participants completed it  
128 (Figure 1A); 7 participants were excluded, as they did not meet the eligibility criteria. Most of  
129 the veterinarians practiced in Canada (n=191; Figure 1B) with the majority practicing in the  
130 province of Ontario (n=108; Figure 1C). Most veterinarians worked in urban areas (Figure 1D)  
131 and practiced general medicine (Figure 1E).

132

133 **Figure 1. Demographics of participants.** A. Graph showing the number of participants who  
134 completed the survey and those who did not. B. Graph showing the countries in which the study  
135 participants practice. C. A pie chart showing the distribution of participants who practiced in  
136 Canada according to provinces. D. Graph showing the hospital setting in which participants  
137 practice. E. Graph showing the type of medicine practiced by participants.

138

139 Veterinarians reported that cannabis toxicoses were most often observed in dogs, followed by  
140 cats, iguanas, ferrets, horses, and cockatoos (Figure 2A – inset). The number of toxicosis cases  
141 reported among all surveyed veterinarians was significantly higher after October 2018  
142 ( $p < 0.0001$ ; Figure 2A). This trend was observed both in Canada ( $p < 0.0001$ ; Figure 2B) and in  
143 the US ( $p = 0.002$ ; Figure 2C). In all hospital settings and practice types, the numbers of  
144 cannabis toxicosis cases were reported to be higher post-legalization (all  $p \leq 0.0001$ ; Figure 2D-  
145 I).

146

147 **Figure 2. Reported toxicosis cases before and after October 2018.** A. All reported cannabis  
148 toxicosis cases pre- and post-legalization. Inset: Species in which cannabis toxicosis was  
149 observed and the number of participants who reported them. B. Reported cannabis toxicosis  
150 cases pre- and post-legalization in Canada. C. Reported cannabis toxicosis cases before and  
151 after October 2018 in the US. D. Reported cannabis toxicosis cases pre- and post-legalization

152 in urban settings. E. Reported cannabis toxicosis cases pre- and post-legalization in sub-urban  
153 settings. F. Reported cannabis toxicosis cases pre- and post-legalization in rural settings. G.  
154 Reported cannabis toxicosis cases pre- and post-legalization by participants who practice  
155 emergency medicine. H. Reported cannabis toxicosis cases pre- and post-legalization by  
156 participants who practice general medicine. I. Reported cannabis toxicosis cases pre- and post-  
157 legalization by participants who practice other types of medicine. Vets: Number of  
158 veterinarians who reported being presented with cannabis toxicosis in a particular species.

159

### 160 **Changes in reports of toxicosis before and after 2018**

161 At the individual level, most veterinarians reported no difference in the number of cannabis  
162 toxicosis cases annually pre- and post-2018 (Figure 3A-C). However, almost all veterinarians  
163 who reported changes between the two periods reported an increase in the number of cases they  
164 observed, in both Canada (Figure 3B) and the US (Figure 3C).

165

### 166 **Figure 3. Changes in cannabis toxicosis case numbers reported by each participant. A.**

167 Graph showing changes in cannabis toxicosis case numbers reported by all participants. Insets:

168 Pie chart showing number of participants who reported equal number of cases pre- and post-

169 legalization (no change) and those who reported different numbers of cases pre- and post-

170 legalization (change) B. Changes in cannabis toxicosis case numbers reported by participants

171 in Canada. C. Changes in cannabis toxicosis case numbers reported by participants in the US.

172 Increase: participants who reported increases in numbers of cannabis toxicosis cases pre- and

173 post-legalization; Decrease: participants who reported decreases in numbers of cannabis

174 toxicosis cases pre- and post-legalization. Inset pie chart: No change: participants who reported

175 equal numbers of cannabis toxicosis cases pre- and post-legalization; Change: participants who

176 reported different numbers of cannabis toxicosis cases pre- and post-legalization.

177 **Commonly observed clinical signs**

178 The clinical signs that veterinarians reported to have observed most commonly (in decreasing  
 179 order) were: urinary incontinence, disorientation, ataxia, lethargy, hyperesthesia, bradycardia,  
 180 stupor/obtundation, and twitching (Table 1). A small number of veterinarians reported  
 181 witnessing other signs including head bobbing and hyperthermia. The Chi square Goodness of  
 182 Fit test and the post-hoc binomial pairwise test revealed that urinary incontinence,  
 183 disorientation, ataxia, lethargy, hyperesthesia, and bradycardia were the clinical signs that  
 184 occurred most frequently (Table 1). Interestingly, except for bradycardia, all these clinical signs  
 185 were reported to be usually severe.

186

187 **Table 1. Aggregate data about cannabis toxicosis clinical signs and their frequencies**  
 188 **reported by Canadian and American veterinarians.**

| Clinical Signs (No. veterinarians)    | Frequencies |       |           |      | Significant frequency <sup>1</sup> |
|---------------------------------------|-------------|-------|-----------|------|------------------------------------|
|                                       | Very often  | Often | Sometimes | Rare |                                    |
| Anorexia (16)                         | 2           | 8     | 5         | 1    |                                    |
| Bradycardia (112)                     | 28          | 56    | 25        | 3    | Often                              |
| Disorientation (182)                  | 116         | 57    | 8         | 1    | Very often                         |
| Diarrhea (4)                          | 0           | 2     | 2         | 0    |                                    |
| Hypertension (5)                      | 0           | 1     | 4         | 0    |                                    |
| Hypotension (15)                      | 1           | 5     | 5         | 4    |                                    |
| Increased anxiety (70)                | 18          | 34    | 14        | 4    |                                    |
| Dry mouth/<br>excessive drinking (11) | 1           | 1     | 9         | 0    |                                    |
| Polyphagia (8)                        | 0           | 4     | 3         | 1    |                                    |
| Vocalizing/Crying (27)                | 3           | 13    | 11        | 0    |                                    |
| Seizures (2)                          | 0           | 0     | 0         | 2    |                                    |
| Tachycardia (19)                      | 0           | 7     | 9         | 3    |                                    |
| Vomiting (57)                         | 4           | 19    | 25        | 9    |                                    |
| Lateral recumbency (42)               | 2           | 10    | 14        | 16   |                                    |
| Urinary incontinence (195)            | 131         | 54    | 6         | 1    | Very often                         |
| Lethargy (150)                        | 98          | 43    | 7         | 2    | Very often                         |
| Stupor/Obtundation (104)              | 17          | 38    | 34        | 15   |                                    |
| Hypothermia (60)                      | 4           | 31    | 22        | 3    |                                    |
| Tremors (56)                          | 8           | 23    | 18        | 7    |                                    |
| Agitation (64)                        | 12          | 28    | 21        | 3    |                                    |
| Respiratory depression (13)           | 0           | 6     | 5         | 2    |                                    |
| Ataxia (178)                          | 131         | 41    | 4         | 2    | Very often                         |

<sup>1</sup> Following a Chi square Goodness-of-Fit test and a binomial pairwise test, the frequency category which was significantly different from the other frequency categories were identified and reported as well.



|                     |    |    |    |   |            |
|---------------------|----|----|----|---|------------|
| Mydriasis (78)      | 24 | 44 | 10 | 0 |            |
| Hyperesthesia (134) | 76 | 39 | 16 | 3 | Very often |
| Twitching (93)      | 20 | 33 | 34 | 6 |            |
| Ptyalism (44)       | 3  | 17 | 23 | 1 |            |

189

## 190 **Products and routes of exposure**

191 As shown in Figure 4A, the products that often led to cannabis toxicosis in pets were edibles  
192 and dried cannabis. Other products reported by veterinarians to cause cannabis toxicosis were  
193 discarded joint butts, human feces, cannabis-infused butter/oil, and compost (Figure 4B). Most  
194 veterinarians (n=105/196) reported that they or the pet owner did not know the source of  
195 cannabis exposure. However, among those who reported the sources of cannabis products that  
196 led to cannabis toxicosis (n=101/196), most (n=34/196) reported that they were obtained from  
197 government regulated producers, followed by home cultivated plants (n=29/196), and the black  
198 market (n=28/196) (results not shown). The most common route of exposure (Figure 4C) was  
199 ingestion, and ingestion while unattended was the most cited reason for exposure (Figure 4D).

200

201 **Figure 4. Products that caused cannabis toxicosis, their routes of exposure, and reasons**  
202 **for exposure.** A. Graph showing the products that were reported to cause cannabis toxicosis  
203 by the study participants. B. Graph showing other products that were reported to cause cannabis  
204 toxicosis by the study participants. C. Graph showing the route of exposure to the products that  
205 caused cannabis toxicosis. D. Graph showing the reasons for exposure to the products that  
206 caused cannabis toxicosis.

207

## 208 **Diagnosis and Treatment**

209 Pets that presented at veterinary hospitals were diagnosed with cannabis toxicosis based on  
210 supportive clinical signs, a history of possible/known exposure, and/or the use of over-the-  
211 counter urine drug tests (Figure 5A). Following diagnosis, the most common treatments

212 included: outpatient monitoring and supportive care, administration of intravenous fluids, in-  
213 hospital monitoring only, administration of activated charcoal, induction of emesis,  
214 administration of anti-emetics, thermal support (warming/cooling), and blood pressure  
215 monitoring (Figure 5B). Animals were usually treated either as outpatients or they were  
216 hospitalized for less than 24 hours (Figure 5C). Most participants reported that all clinical signs  
217 resolved following cannabis exposure, except for a few pets that reportedly died in association  
218 with cannabis toxicosis (n=16 animals). The cost of treatment for majority of the cases was  
219 less than CAD\$ 500 (Figure 5D).

220

221 **Figure 5. Diagnosis and treatments for cannabis toxicosis, and deaths associated with**  
222 **cannabis toxicosis and their causes.** A. Graph showing methods used by participants to  
223 diagnose cannabis toxicosis. B. Graph showing various treatments for cannabis toxicosis  
224 reported by participants. C. Graph showing treatment duration following cannabis toxicosis.  
225 D. Graph showing cost of treatment for cannabis toxicosis. E. Graph showing the number of  
226 participants who either reported deaths or no deaths associated with cannabis toxicosis in pets.  
227 F. Graph showing the causes of deaths reportedly associated with cannabis toxicosis.

228

229 Even though most of the veterinarians reported no deaths (211/221), 10/221 veterinarians  
230 reported a total of 16 deaths believed to be attributable to cannabis toxicosis (Figure 5E). Other  
231 than euthanasia (n=2), the causes of death reported to be associated with cannabis exposures  
232 were aspiration pneumonia (n=5), respiratory arrest (n=3), uncontrolled seizures (n=2), coma  
233 (n=2), and pancreatitis (n=1) (Figure 5F).

234

235 **DISCUSSION**

236 Cannabis toxicosis was frequently reported in dogs, and in both Canada and the US, the number  
237 of cannabis toxicosis cases increased significantly after October 2018 (which coincided with  
238 legalization in Canada, but not the US). Additionally, of those who reported a change (85/211),  
239 nearly all (82/85) reported an increase in the number of cases.. Among the reported clinical  
240 signs of cannabis toxicosis (primarily observed in dogs, therefore clinical signs we report  
241 herein are likely biased towards canine-specific presentations), urinary incontinence, ataxia,  
242 disorientation, bradycardia, hyperesthesia, and lethargy were most common. The product  
243 which often caused cannabis toxicosis was edibles, and the most common route of exposure  
244 was via oral ingestion, with the most common reason being ingestion while unattended.  
245 Diagnosis was frequently based on the presence of supportive clinical signs, and the most  
246 common treatment was outpatient monitoring, which lasted for less than 48 hours. Except for  
247 a few patients that were reported to have died in association with cannabis exposure, all patients  
248 recovered completely after treatment, with a total treatment cost less than CAD \$500.  
249 Similar to other studies (7), the pets that were treated most often by the veterinarians in our  
250 sample were cats and dogs. This is consistent with a recent survey which revealed that there  
251 were 7.7 million dogs and 8.1 million cats in Canadian households (8). In our study, cannabis  
252 toxicoses were frequently observed in dogs compared to cats, similar to that previously  
253 reported (7). Consistent with previous work, participants also reported cannabis toxicoses in  
254 other companion animal species such as horses and iguanas (7, 9), and also in previously  
255 unreported species such as pet cockatoos and ferrets.  
256 Similar to a number of previous studies (5, 10), we observed an overall increase in the number  
257 of cannabis toxicosis cases after October 2018, even though our analysis at the participant-  
258 level revealed that majority of the participants reported equal case numbers pre- and post-  
259 legalization. This could be because participants did not report the actual case numbers but  
260 rather selected among predetermined numeric ranges. As such, small increases that were within

261 the same range, would have been reported as “no change.” The increase in case numbers could  
262 be due to any combination of the following factors: 1. legalization of cannabis for medical and  
263 recreational use in Canada; 2. increased reporting by pet owners due to legalization; and 3.  
264 increased awareness of veterinarians about cannabis toxicoses (5, 10). Moreover, it is important  
265 to consider the pharmacology of cannabinoids in cannabis, and how they may have contributed  
266 to the findings noted above.

267

### 268 **Pharmacokinetics and pharmacodynamics of THC**

269 The two major cannabinoids in cannabis are delta-9-tetrahydrocannabinol (THC) and its  
270 isomer, cannabidiol (CBD) (11). THC is the main psychoactive cannabinoid that produces  
271 euphoria but can also have intoxicating effects (11, 12). Meanwhile, CBD is considered non-  
272 psychoactive despite its anxiolytic, antipsychotic, and anti-inflammatory effects (13-15).  
273 Despite the difficulty in determining the exact time to onset of clinical signs following cannabis  
274 toxicosis since owners only seek medical attention upon the appearance of clinical signs; in  
275 dogs, the onset of clinical signs ranges from within minutes post-inhalation (16) to several  
276 hours post-ingestion (17, 18). This delay in onset may be due to the long biological half-life of  
277 THC in dogs due to adipose tissue storage, even though the THC plasma half-life is relatively  
278 short (16). The delayed onset of clinical signs may also be due to the time it takes for THC to  
279 undergo first-pass liver metabolism post-ingestion (17). When compared to humans, dogs seem  
280 to have similar oral absorption, but a much longer duration and wider range of clinical signs.  
281 Dogs produce the additional THC metabolites 8-OH- $\Delta^9$ -THC and 11-OH-THC, which may  
282 contribute to the additional clinical signs observed only in dogs (16, 19). 11-OH-THC is an  
283 active metabolite that may be produced in larger quantities after cannabis ingestion following  
284 first pass metabolism.

285 Given that dogs were the species in which cannabis toxicosis was reported most frequently in  
286 our study, and that majority of the signs of cannabis toxicosis were neurological, similar to  
287 what others have reported in dogs, (18), the subsequent discussion will predominantly focus  
288 on these neurological signs. Among the clinical signs of cannabis toxicosis reported in our  
289 study, the most common was urinary incontinence. Expression of cannabinoid receptors has  
290 been demonstrated in the bladders of humans, rats, and mice (20-22). Even though the  
291 mechanism by which THC regulates bladder contractility *in vivo* is unclear, it was previously  
292 shown that in mice, the administration of THC in bladder tissue inhibited electrically-evoked  
293 contractions of the bladder (21), which could lead to urinary incontinence. This was also  
294 demonstrated in rats using a CB1 receptor agonist (20). Cannabinoid receptors have not yet  
295 been confirmed in the dog bladder; however, if cannabinoid receptor expression is conserved,  
296 bladder hyperactivity through increases in contraction could be contributing to the reported  
297 incontinence.

298 Cannabis toxicosis also resulted in bradycardia. In rats, the bradycardic effect of THC on the  
299 heart involves CB1-like cannabinoid receptors (23). Although a previous study has shown that  
300 bradycardia may result from the effects of THC directly on catecholamine receptors (including  
301 adrenergic receptors) in the heart (24), another study in cats concluded that THC decreases  
302 central adrenergic neuronal activity, leading to decreased sympathetic tone, and subsequently  
303 causing bradycardia (25). Schmid, Schwartz (26) reported the presence of the  
304 endocannabinoids, anandamide and 2-arachidonoylglycerol in the rat heart, while both CB1  
305 and CB2 receptors were detected in the myocardia of rats, mice, and guinea pigs (27-29). CB1  
306 mRNA was also detected in the human heart (30, 31). All the aforementioned studies suggest  
307 that the bradycardic effects of THC may be mediated by several types of receptors, including  
308 cannabinoid receptors, in the heart.

309 Due to the lipophilic nature of THC, it is easily taken up by highly-perfused organs like the  
310 brain (32), which may explain the neurological signs of cannabis toxicosis. Ataxia, a common  
311 neurological symptom of cannabis toxicosis in both humans and animals, refers to the lack of  
312 coordination during movement. In the brain, the region responsible for coordination is the  
313 cerebellum (33), which contains a higher number of CB1 receptors in dogs as compared to  
314 humans (34). Patel and Hillard (35) showed that intraperitoneal THC administration in a mouse  
315 caused motor deficits including ataxia. They subsequently proposed that even though THC  
316 inhibits both excitatory and inhibitory synapses in the cerebellum, its main mechanism of  
317 action is the inhibition of the inhibitory synapses (basket cell/Purkinje cell), leading to the  
318 disinhibition of Purkinje cells. Firing of these GABAergic cells inhibits deep cerebellar nuclei  
319 cells, thus resulting in ataxia. A similar mechanism may occur in dogs, but further investigation  
320 is required.

321 Previous studies in chronic fatigue syndrome patients revealed that brain regions implicated  
322 include the basal ganglia, anterior cingulate, and frontal, temporal, and parietal regions (36,  
323 37). These regions also overlap with brain regions implicated in motivation (38). Interestingly,  
324 these regions in humans and animals contain CB1 receptors (34, 39), which can be modulated  
325 by THC. This may explain how cannabis toxicosis can cause lethargy. Disorientation is the  
326 loss of a sense of direction and mental confusion. Frontal and temporal cortices, regions shown  
327 to contain CB1 receptors (34, 39, 40), are involved during mental orientation in space and time;  
328 the disorientation exhibited by pets during cannabis toxicosis may involve THC modulation of  
329 CB1 receptors in similar regions of the brain (41).

330

### 331 **Products that caused cannabis toxicosis and the routes and reasons for exposure**

332 In our study, edibles were the most common cannabis product that resulted in toxicosis, which  
333 is not surprising since they are the most common form of cannabis products purchased for dogs

334 (3); however it is difficult to ascertain from our findings whether these edible products were  
335 purchased for human or animal consumption. Pets are often exposed to homemade or  
336 commercial edible goods, which are typically made using THC butter (5). In our study, and  
337 previous studies (9, 18), plant materials, including dried and fresh green cannabis, was another  
338 common product that led to cannabis toxicosis. The least common cannabis toxicosis-causing  
339 products were topical cannabis products, capsulated cannabis products, and tablets containing  
340 cannabinoids.

341 The most common source of cannabis toxicosis-causing products reported by veterinarians was  
342 government-regulated producers, followed by home-cultivated plants. A few pet owners  
343 reported that they obtained the products from the black market, however, this might be  
344 susceptible to under-reporting. In our study, ingestion was reported as the most common route  
345 of exposure. Compared to inhalation (42), which was the second most common route of  
346 exposure reported in our study, ingestion of edibles made with THC butter has been reported  
347 to result in more severe clinical signs and a higher risk for cannabis toxicosis in animals, since  
348 a majority of animals presenting with moderate to severe clinical signs of toxicosis had ingested  
349 some form of cannabis product including edible goods (5, 9, 18). Furthermore, the presence of  
350 other toxins (e.g., chocolate) in the edible product may have contributed to clinical illness, and  
351 may explain some of the deaths reported by veterinarians in our study and in another  
352 retrospective study (5). Even though less common, the ingestion of synthetic cannabinoids also  
353 leads to more severe clinical signs (43), and is known to be lethal in dogs (44).

354 The most commonly stated reason for pet exposure to cannabis was via oral ingestion while  
355 unattended, which was also reported in a previous study (42), followed by intentional  
356 administration for recreation (given to pets for fun?), or as a medical treatment. Our findings  
357 suggest that pet owners would have to put measures in place to prevent pets from accessing  
358 cannabis products including restricting cannabis to hard-to-access areas of the house, putting

359 their cannabis products in pet-proof containers, and monitoring pets when cannabis-based  
360 products may be accessible. Some pet owners stated that cannabis toxicosis occurred following  
361 medical treatment which may be a result of unintended over-administration of these drugs due  
362 to the delay in manifestation of their effects. A small number of participants reported that some  
363 pets, specifically dogs, were exposed while being walked.

364

365

### 366 **Diagnosis of cannabis toxicosis**

367 In our study, the most common diagnostic method was the use of supportive clinical signs,  
368 along with a history of possible/known exposure, and/or the use of over-the-counter urine drug  
369 test kits. The key to appropriate treatment and successful recovery is accurate diagnosis, based  
370 on clinical signs, and accurate medical history from pet owners. Pet owners may be inclined to  
371 withhold information from veterinarians regarding accidental exposures to drugs (18) for fear  
372 of legal consequences. Therefore, veterinarians must encourage owners to provide complete  
373 histories when possible (17).

374 Many veterinarians in our study reported diagnosing cannabis toxicosis using urine drug test  
375 kits. The use of urine test kits in dogs may be unreliable based on interactions with other drugs,  
376 since patients on nonsteroidal anti-inflammatory drugs could have false-positive results (45).  
377 The incidence of false-negative results using the human urine drug test kit is also a concern.  
378 False negatives may occur if the urine sample is tested too soon after exposure (5), if the urine  
379 sample is not handled appropriately leading to the THC binding to the rubber stoppers and  
380 glass containers (5), if the patient consumed synthetic cannabinoids (46), or if the patient has  
381 diluted urine (47). In dogs, false negatives can also occur since THC is metabolized into 8-OH-  
382  $\Delta^9$ -THC, which may not be detected by the human urine drug test kits (48) since they were not  
383 designed to detect this compound.



384

385 **Treatments for cannabis toxicosis**

386 In our study, the treatment method used most frequently was outpatient monitoring, followed  
387 by the administration of intravenous fluids, activated charcoal, and anti-emetics. Intravenous  
388 fluids can be administered as a form of supportive care (16, 43) to prevent both dehydration  
389 (i.e., from vomiting) and hypothermia (17) during cannabis toxicosis. Activated charcoal is  
390 often administered to prevent further absorption of the ingested material in the stomach and aid  
391 in decontamination (16). This method was recommended in previous studies for many of the  
392 dogs that experienced cannabis toxicosis and for all the iguanas (5, 9, 18). Induction of emesis  
393 is commonly performed in dogs, cats, and iguanas as an initial treatment if a toxic dose was  
394 ingested within 15-30 minutes or a significant amount of plant material remains in the stomach  
395 (5, 9, 16, 18, 42, 43, 49). It is safest to perform this procedure if the patient is still asymptomatic  
396 and with a normal mentation, to decrease the risk of aspiration (16). Emesis should never be  
397 induced if the animal is extremely agitated, severely depressed, or unresponsive (17). The  
398 administration of intravenous intra-lipids was a treatment method reported by several  
399 participants in our study. This method was reportedly used to treat a Boxer dog that ingested  
400 synthetic cannabinoids and was also used in a dog that died during treatment after ingesting  
401 THC butter, even though this method can have adverse effects such as leading to serum lipemia  
402 (5, 43). However, it may be useful for patients that are unresponsive to conventional treatments  
403 (16).

404 Treatment duration and recovery time following cannabis toxicosis depends on the severity of  
405 the toxicosis, which is dependent on the dose of THC (or other cannabinoids), quantity of  
406 cannabis or cannabis products consumed, and the route of exposure. In our study, veterinarians  
407 reported that most animals were treated as outpatients, while the remaining patients were  
408 hospitalized for less than 48 hours. This is not surprising since pets usually recover within 72

409 hours after cannabis toxicosis (7, 16). A wide range of recovery times have been reported in  
410 the literature, but they appear to vary between species (9, 18, 42, 43, 49).

411

#### 412 **Potential lethality of cannabis requires further investigation**

413 Although most of the cannabis toxicosis cases in companion animals made a full recovery, 10  
414 veterinarians cited death as an outcome for 16 cases. The details surrounding each case were  
415 not captured, thus we cannot be certain that exposure to cannabis directly resulted in mortality,  
416 or that the presence of other toxins found in edible products (e.g., chocolate, xylitol), or other  
417 underlying medical conditions contributed to the fatalities. In certain cases, it appears that  
418 cannabis was unlikely to be the primary cause of death, such as with aspiration pneumonia. In  
419 other cases, it may be possible that cannabis may have resulted in death directly, for example  
420 cases that report coma, uncontrolled seizures, or respiratory arrest as the primary clinical signs.  
421 These clinical signs are consistent with the mechanism of lethality in rats as reported by  
422 Thompson, Rosenkrantz (50), but the lethality of cannabis in dogs has not yet been confirmed.  
423 Previous research aiming to determine the lethal dose of cannabis in dogs was unable to  
424 determine a lethal dose (administering up to 9000 mg/kg orally), and this issue has been the  
425 subject of controversy in the veterinary field, with several sources misreferencing this original  
426 scientific study (51, 52). Previous field reports claiming that cannabis resulted in the deaths of  
427 animals arrived at this diagnosis through exclusion of other diagnoses (5), and thus do not  
428 represent strong scientific evidence; further basic research is needed to determine the potential  
429 lethality of non-synthetic cannabis in dogs and other pets, and its mechanism, if applicable.  
430 The suspected cases documented here, however, provide some guidance regarding this research  
431 gap; small and/or young animals may be more likely to be exposed to a higher apparent dosage,  
432 particularly for cannabis edibles, and due to their small body mass, could theoretically be more

433 likely to succumb to an overdose and associated central nervous system depression, as was  
434 seen in rats in the lethality study (50).

435 Regardless of lethality, aggressive treatment of young and/or small animals is warranted in  
436 most cases, since the dosage may be unknown, and decontamination with emetics, IV fluids,  
437 and activated charcoal is considered a relatively safe treatment course. Naloxone infusions may  
438 also be considered in severe cannabis toxicoses cases, since there is some clinical evidence  
439 from human medicine that this opioid antagonist is effective in treating cannabis overdoses,  
440 because it also binds to endocannabinoid receptors (53).

#### 441 **Limitations**

442 The aggregate data collected by this veterinarian-based survey are prone to several biases.  
443 Since the survey was voluntary, a selection bias could have skewed the data; participants from  
444 states or provinces where cannabis is legal for recreational use may be more likely to see or  
445 report cases of cannabis toxicosis in animals compared with participants practicing in states or  
446 provinces where cannabis remains illegal for recreational use in humans. Furthermore, this  
447 survey data may be prone to recall bias, as veterinarians may not accurately remember the  
448 details of previous cases. Most importantly, the type of data collected here represents subjective  
449 aggregated data concerning cannabis toxicosis cases seen and reported by veterinarians; thus,  
450 raw numerical data concerning individual animals was not captured here. Consequently, the  
451 data presented herein should be interpreted with caution, and are, in some cases, inevitably  
452 vague and imprecise, particularly for the types and frequencies of clinical signs. Additionally,  
453 our data may also be prone to misclassification bias because of the lack of highly sensitive and  
454 specific diagnostic tests to confirm cannabis intoxication in animals. Thus, most of the  
455 diagnoses were made based on clinical signs along with a history of possible or known  
456 exposure. The latter requires veterinarians to rely on the history reported by pet owners, which

457 may not always be completely honest due to the stigma which continues to surround cannabis,  
458 despite legalization.

459

## 460 **CONCLUSIONS**

461 Based on our veterinarian-reported survey data, the incidence of cannabis toxicoses in  
462 companion animals (primarily dogs) appears to have increased following legalization of  
463 cannabis for recreational purposes in Canada in October 2018. Although several factors may  
464 account for this apparent increase in cannabis toxicosis cases, the increased availability of  
465 cannabis products for humans is likely an important factor, since most of the toxicoses reported  
466 here resulted from inadvertent exposures; however, edibles were not legalized in Canada until  
467 October 2019, even though edibles were reported as the most common source of exposure in  
468 our study. The lack of veterinary oversight regarding the medicinal use of cannabis for animals  
469 in Canada also remains problematic and may also be contributing to a certain portion of these  
470 reported toxicoses, as many pet owners attempt to self-medicate their animals with these  
471 products (some of which are from the black market). Most of the cannabis toxicoses in animals  
472 appear to be benign; most cases resulted in mild to moderate clinical signs (most commonly,  
473 lethargy, disorientation, urinary incontinence, ataxia, and hyperesthesia), were treated as  
474 outpatients, and nearly all animals were reported to have fully recovered. Although several  
475 veterinarians in our survey reported deaths in association with cannabis exposure, rigorous  
476 controlled laboratory studies are needed to investigate this important and controversial issue,  
477 to eliminate or control for the presence of confounders such as other toxins (e.g., illicit drugs,  
478 chocolate, xylitol), other underlying disease processes, or causes of death secondary to  
479 cannabis ingestion (e.g., aspiration pneumonia). Finally, the use of clinical history and over-  
480 the-counter urine drug tests, although routinely used to diagnose cannabis toxicity cases in

481 clinical practice, may be prone to false positive or false negative test results. There is a need  
482 for more sensitive and specific diagnostic tests to diagnose cannabis toxicities, whether to  
483 support aggressive decontamination procedures in high-risk patients, or to differentiate  
484 between non-synthetic cannabis (lethality unknown) and synthetic cannabis (known to be lethal  
485 in dogs; Hanasono, Sullivan (44)). As the burgeoning field of medicinal cannabis use in  
486 humans and animals continues to grow, fundamental research into the pharmacokinetics,  
487 pharmacodynamics, and potential lethality of cannabis in different animal species is also  
488 needed to address outstanding research gaps.

#### 489 **FUNDING**

490 This research was funded by a Natural Sciences and Engineering Research Council Alliance  
491 Grant (ALLRP 549529 to JYK; [https://www.nserc-crsng.gc.ca/innovate-innover/alliance-](https://www.nserc-crsng.gc.ca/innovate-innover/alliance-alliance/index_eng.asp)  
492 [alliance/index\\_eng.asp](https://www.nserc-crsng.gc.ca/innovate-innover/alliance-alliance/index_eng.asp)) and a MITACS Accelerate Fellowship (IT27597 to RQA and JYK;  
493 <https://www.mitacs.ca/en/programs/accelerate/fellowship>) in partnership with Avicanna Inc.

#### 494 **DISCLOSURES**

495 Dr. Urban is an employee of Avicanna Inc., during which time she has received stock options.  
496 Avicanna Inc. did not influence the design, conduct or interpretation of the data derived from  
497 this study.

498

#### 499 **REFERENCES**

- 500 1. UNODC. Cannabis and Hallucinogens. World Drug Report: United Nations; 2019. p.  
501 76.  
502 2. Vogt NA, Sargeant JM, Stevens CP, Dunn JN. A survey of veterinary student attitudes  
503 concerning whether marijuana could have therapeutic value for animals. PloS one.  
504 2019;14(7):e0219430.

- 505 3. Kogan LR, Hellyer PW, Silcox S, Schoenfeld-Tacher R. Canadian dog owners' use and  
506 perceptions of cannabis products. *Can Vet J*. 2019;60(7):749-55.
- 507 4. De Briyne N, Holmes D, Sandler I, Stiles E, Szymanski D, Moody S, et al. Cannabis,  
508 Cannabidiol Oils and Tetrahydrocannabinol—What Do Veterinarians Need to Know?  
509 *Animals*. 2021;11(3):892.
- 510 5. Meola SD, Tearney CC, Haas SA, Hackett TB, Mazzaferro EM. Evaluation of trends  
511 in marijuana toxicosis in dogs living in a state with legalized medical marijuana: 125 dogs  
512 (2005-2010). *J Vet Emerg Crit Care (San Antonio)*. 2012;22(6):690-6.
- 513 6. Stillabower A. Marijuana Toxicity in Pets: Pet Poison Helpline; 2019 [Available from:  
514 <https://www.petpoisonhelpline.com/pet-safety-tips/marijuana-toxicity-pets/>].
- 515 7. Donaldson CW. Marijuana exposure in animals. *Veterinary Medicine*. 2002:437.
- 516 8. Canadian Animal Health Institute. 2020 Canadian pet population figures released:  
517 Canadian Animal Health Institute; 2021 [updated 15th February 2021. Available from:  
518 <https://cahi-icsa.ca/news/2020-canadian-pet-population-figures-released>].
- 519 9. Girling SJ, Fraser MA. Cannabis intoxication in three Green iguanas (*Iguana iguana*).  
520 *J Small Anim Pract*. 2011;52(2):113-6.
- 521 10. Howard-Azzeh M, Pearl DL, Swirski A, Ward M, Hovdey R, O'Sullivan TL, et al. The  
522 impact of state cannabis legislation, county-level socioeconomic and dog-level characteristics  
523 on reported cannabis poisonings of companion dogs in the USA (2009-2014). *PLoS One*.  
524 2021;16(4):e0250323.
- 525 11. Atakan Z. Cannabis, a complex plant: different compounds and different effects on  
526 individuals. *Therapeutic advances in psychopharmacology*. 2012;2(6):241-54.
- 527 12. Grotenhermen F, Müller-Vahl K. Medicinal uses of marijuana and cannabinoids.  
528 *Critical Reviews in Plant Sciences*. 2016;35(5-6):378-405.
- 529 13. Costa B, Trovato AE, Comelli F, Giagnoni G, Colleoni M. The non-psychoactive  
530 cannabis constituent cannabidiol is an orally effective therapeutic agent in rat chronic  
531 inflammatory and neuropathic pain. *European journal of pharmacology*. 2007;556(1-3):75-83.
- 532 14. Malfait A, Gallily R, Sumariwalla P, Malik A, Andreakos E, Mechoulam R, et al. The  
533 nonpsychoactive cannabis constituent cannabidiol is an oral anti-arthritis therapeutic in murine  
534 collagen-induced arthritis. *Proceedings of the National Academy of Sciences*.  
535 2000;97(17):9561-6.
- 536 15. Vučković S, Srebro D, Vujović KS, Vučetić Č, Prostran M. Cannabinoids and pain:  
537 new insights from old molecules. *Frontiers in pharmacology*. 2018;9:1259.
- 538 16. Brutlag A, Hommerding H. Toxicology of Marijuana, Synthetic Cannabinoids, and  
539 Cannabidiol in Dogs and Cats. *Vet Clin North Am Small Anim Pract*. 2018;48(6):1087-102.
- 540 17. Fitzgerald KT, Bronstein AC, Newquist KL. Marijuana poisoning. *Top Companion*  
541 *Anim Med*. 2013;28(1):8-12.
- 542 18. Janczyk P, Donaldson CW, Gwaltney S. Two hundred and thirteen cases of marijuana  
543 toxicoses in dogs. *Vet Hum Toxicol*. 2004;46(1):19-21.
- 544 19. Chicoine A, Illing K, Vuong S, Pinto K, Alcorn J, Cosford K. Pharmacokinetic and  
545 safety evaluation of various oral doses of a novel 1: 20 THC: CBD cannabis herbal extract in  
546 dogs. *Frontiers in Veterinary Science*. 2020;7:708.
- 547 20. Martin RS, Luong LA, Welsh NJ, Eglen RM, Martin GR, MacLennan SJ. Effects of  
548 cannabinoid receptor agonists on neuronally-evoked contractions of urinary bladder tissues  
549 isolated from rat, mouse, pig, dog, monkey and human. *Br J Pharmacol*. 2000;129(8):1707-15.
- 550 21. Pertwee RG, Fernando SR. Evidence for the presence of cannabinoid CB1 receptors in  
551 mouse urinary bladder. *Br J Pharmacol*. 1996;118(8):2053-8.
- 552 22. Tyagi V, Philips BJ, Su R, Smaldone MC, Erickson VL, Chancellor MB, et al.  
553 Differential expression of functional cannabinoid receptors in human bladder detrusor and  
554 urothelium. *J Urol*. 2009;181(4):1932-8.

- 555 23. Lake KD, Compton DR, Varga K, Martin BR, Kunos G. Cannabinoid-induced  
556 hypotension and bradycardia in rats mediated by CB1-like cannabinoid receptors. *J Pharmacol*  
557 *Exp Ther.* 1997;281(3):1030-7.
- 558 24. Trouve R, Nahas G. Cardiovascular Effects of Marihuana and Cannabinoids. In: Nahas  
559 G, editor. *Marihuana and Medicine*. Totowa, NJ: Humana Press Inc.; 1999. p. 291-6.
- 560 25. Vollmer RR, Cavero I, Ertel RJ, Solomon TA, Buckley JP. Role of the central  
561 autonomic nervous system in the hypotension and bradycardia induced by (-)-delta 9-trans-  
562 tetrahydrocannabinol. *J Pharm Pharmacol.* 1974;26(3):186-92.
- 563 26. Schmid PC, Schwartz KD, Smith CN, Krebsbach RJ, Berdyshev EV, Schmid HH. A  
564 sensitive endocannabinoid assay. The simultaneous analysis of N-acylethanolamines and 2-  
565 monoacylglycerols. *Chem Phys Lipids.* 2000;104(2):185-91.
- 566 27. Bouchard JF, Lépicier P, Lamontagne D. Contribution of endocannabinoids in the  
567 endothelial protection afforded by ischemic preconditioning in the isolated rat heart. *Life Sci.*  
568 2003;72(16):1859-70.
- 569 28. Wang PF, Jiang LS, Bu J, Huang XJ, Song W, Du YP, et al. Cannabinoid-2 receptor  
570 activation protects against infarct and ischemia-reperfusion heart injury. *J Cardiovasc*  
571 *Pharmacol.* 2012;59(4):301-7.
- 572 29. Currie S, Rainbow RD, Ewart MA, Kitson S, Pliego EH, Kane KA, et al. IP(3)R-  
573 mediated Ca(2+) release is modulated by anandamide in isolated cardiac nuclei. *J Mol Cell*  
574 *Cardiol.* 2008;45(6):804-11.
- 575 30. Galiègue S, Mary S, Marchand J, Dussossoy D, Carrière D, Carayon P, et al. Expression  
576 of central and peripheral cannabinoid receptors in human immune tissues and leukocyte  
577 subpopulations. *Eur J Biochem.* 1995;232(1):54-61.
- 578 31. Bonz A, Laser M, Küllmer S, Kniesch S, Babin-Ebell J, Popp V, et al. Cannabinoids  
579 acting on CB1 receptors decrease contractile performance in human atrial muscle. *J Cardiovasc*  
580 *Pharmacol.* 2003;41(4):657-64.
- 581 32. Huestis MA. Human cannabinoid pharmacokinetics. *Chem Biodivers.* 2007;4(8):1770-  
582 804.
- 583 33. Thach WT, Goodkin H, Keating J. The cerebellum and the adaptive coordination of  
584 movement. *Annual review of neuroscience.* 1992;15(1):403-42.
- 585 34. Herkenham M, Lynn AB, Little MD, Johnson MR, Melvin LS, de Costa BR, et al.  
586 Cannabinoid receptor localization in brain. *Proc Natl Acad Sci U S A.* 1990;87(5):1932-6.
- 587 35. Patel S, Hillard CJ. Cannabinoid CB(1) receptor agonists produce cerebellar  
588 dysfunction in mice. *J Pharmacol Exp Ther.* 2001;297(2):629-37.
- 589 36. Ichise M, Salit IE, Abbey SE, Chung DG, Gray B, Kirsh JC, et al. Assessment of  
590 regional cerebral perfusion by 99Tcm-HMPAO SPECT in chronic fatigue syndrome. *Nucl*  
591 *Med Commun.* 1992;13(10):767-72.
- 592 37. Kuratsune H, Watanabe Y, Yamaguti K, Jacobsson G, Takahashi M, Machii T, et al.  
593 High uptake of [2-11C]acetyl-L-carnitine into the brain: a PET study. *Biochem Biophys Res*  
594 *Commun.* 1997;231(2):488-93.
- 595 38. Kim SI. Neuroscientific model of motivational process. *Front Psychol.* 2013;4:98.
- 596 39. Glass M, Dragunow M, Faull RL. Cannabinoid receptors in the human brain: a detailed  
597 anatomical and quantitative autoradiographic study in the fetal, neonatal and adult human  
598 brain. *Neuroscience.* 1997;77(2):299-318.
- 599 40. Freundt-Revilla J, Kegler K, Baumgärtner W, Tipold A. Spatial distribution of  
600 cannabinoid receptor type 1 (CB1) in normal canine central and peripheral nervous system.  
601 *PLoS One.* 2017;12(7):e0181064.
- 602 41. Peer M, Salomon R, Goldberg I, Blanke O, Arzy S. Brain system for mental orientation  
603 in space, time, and person. *Proc Natl Acad Sci U S A.* 2015;112(35):11072-7.

- 604 42. Janeczek A, Zawadzki M, Szpot P, Niedzwiedz A. Marijuana intoxication in a cat. *Acta*  
605 *Vet Scand.* 2018;60(1):44.
- 606 43. Williams K, Wells RJ, McLean MK. Suspected synthetic cannabinoid toxicosis in a  
607 dog. *J Vet Emerg Crit Care (San Antonio).* 2015;25(6):739-44.
- 608 44. Hanasono G, Sullivan H, Gries C, Jordan W, Emmerson J. A species comparison of the  
609 toxicity of nabilone, a new synthetic cannabinoid. *Fundamental and Applied Toxicology.*  
610 1987;9(2):185-97.
- 611 45. Rollins DE, Jennison TA, Jones G. Investigation of interference by nonsteroidal anti-  
612 inflammatory drugs in urine tests for abused drugs. *Clin Chem.* 1990;36(4):602-6.
- 613 46. Obafemi AI, Kleinschmidt K, Goto C, Fout D. Cluster of Acute Toxicity from Ingestion  
614 of Synthetic Cannabinoid-Laced Brownies. *J Med Toxicol.* 2015;11(4):426-9.
- 615 47. Cone EJ, Lange R, Darwin WD. In vivo adulteration: excess fluid ingestion causes  
616 false-negative marijuana and cocaine urine test results. *J Anal Toxicol.* 1998;22(6):460-73.
- 617 48. Teitler JB. Evaluation of a human on-site urine multidrug test for emergency use with  
618 dogs. *J Am Anim Hosp Assoc.* 2009;45(2):59-66.
- 619 49. Godbold JC, Jr., Hawkins BJ, Woodward MG. Acute oral marijuana poisoning in the  
620 dog. *J Am Vet Med Assoc.* 1979;175(10):1101-2.
- 621 50. Thompson GR, Rosenkrantz H, Schaeppi UH, Braude MC. Comparison of acute oral  
622 toxicity of cannabinoids in rats, dogs and monkeys. *Toxicol Appl Pharmacol.* 1973;25(3):363-  
623 72.
- 624 51. Ettinger SJ, Feldman EC, Cote E. *Textbook of Veterinary Internal Medicine-eBook:*  
625 *Elsevier health sciences;* 2017.
- 626 52. Peterson ME, Talcott PA. *Small Animal Toxicology-E-Book: Elsevier Health*  
627 *Sciences;* 2013.
- 628 53. Richards JR, Schandera V, Elder JW. Treatment of acute cannabinoid overdose with  
629 naloxone infusion. *Toxicology Communications.* 2017;1(1):29-33.
- 630

## 631 SUPPLEMENTAL INFORMATION

632 **S1 File. Sample of online survey questionnaire.**



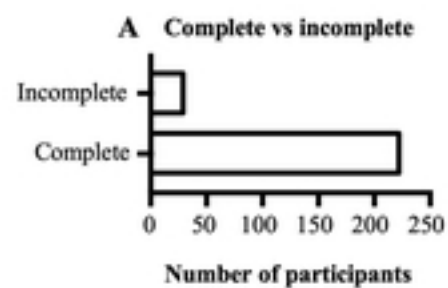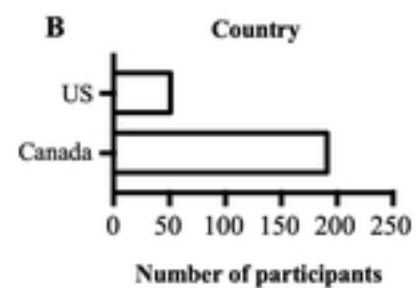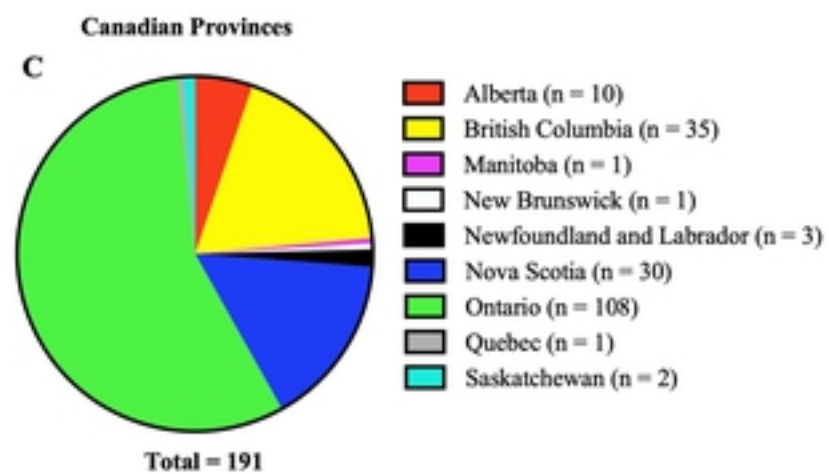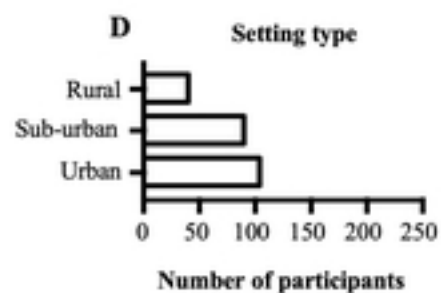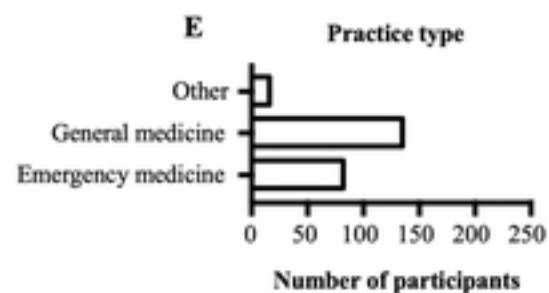

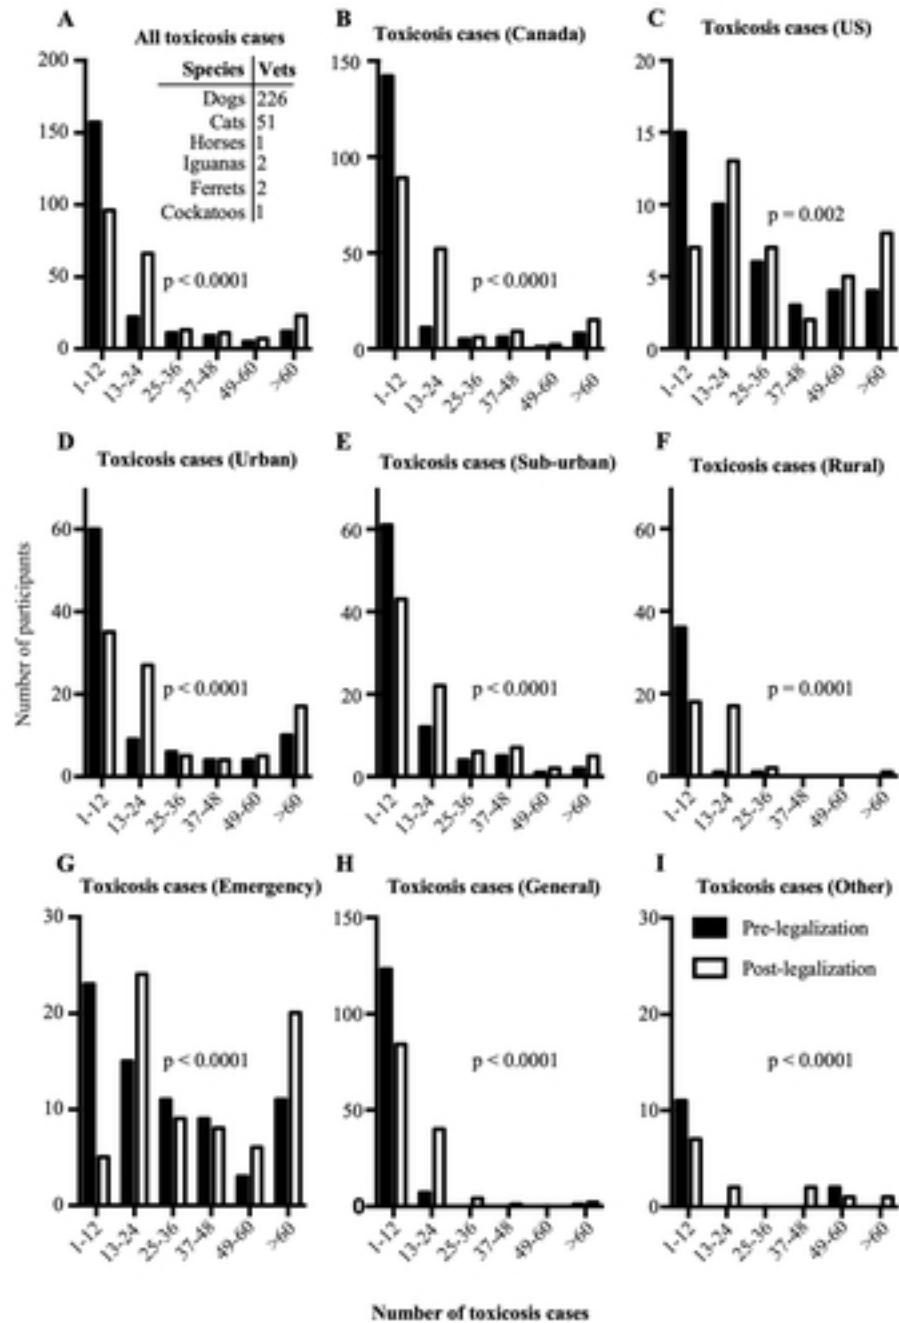

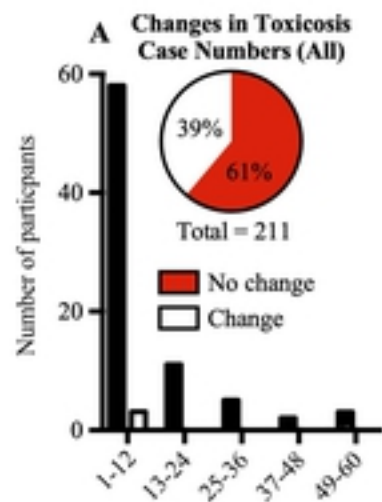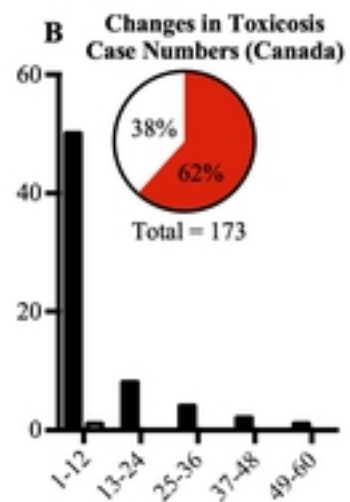

Changes in case numbers

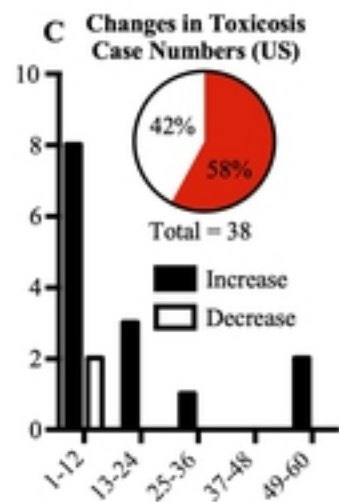

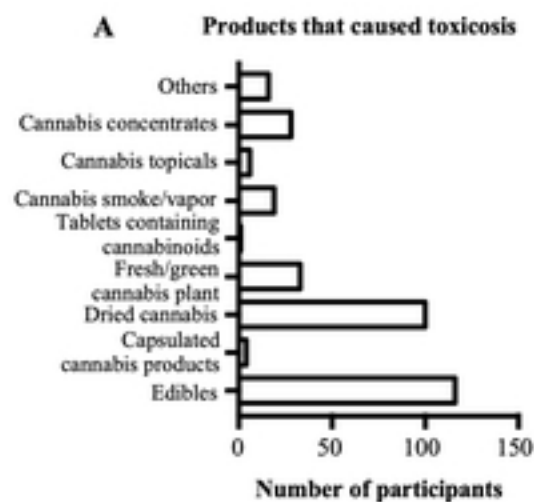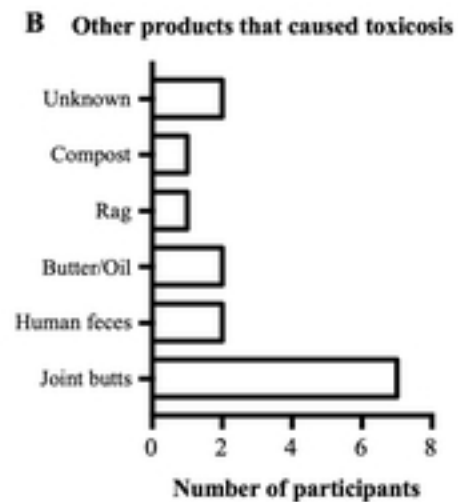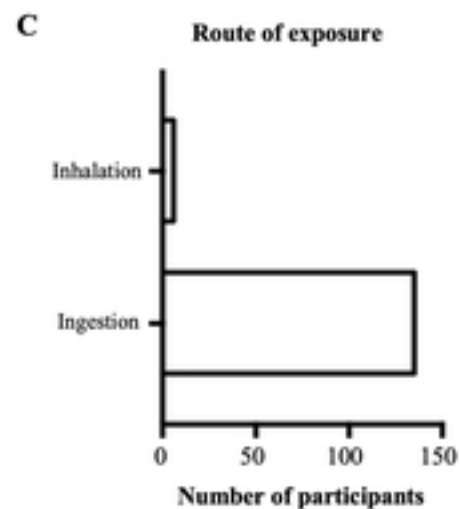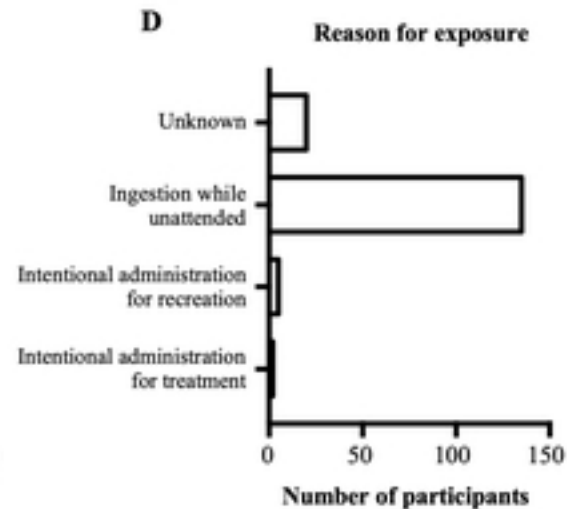

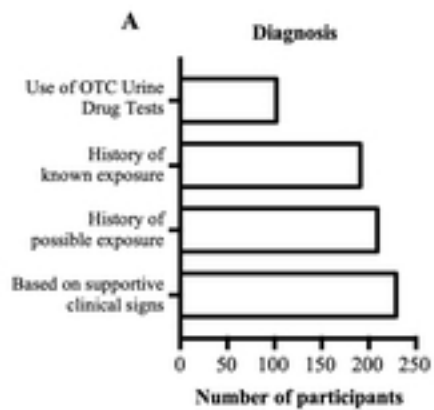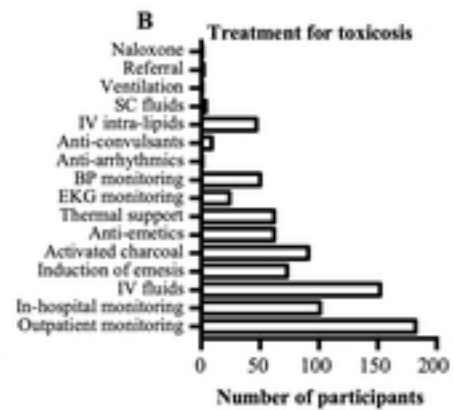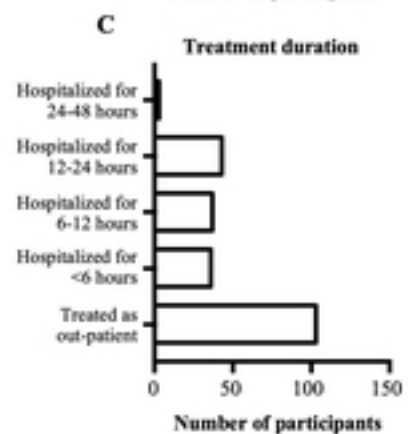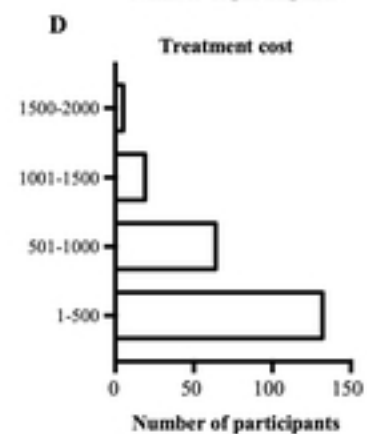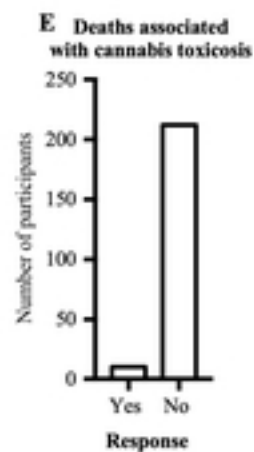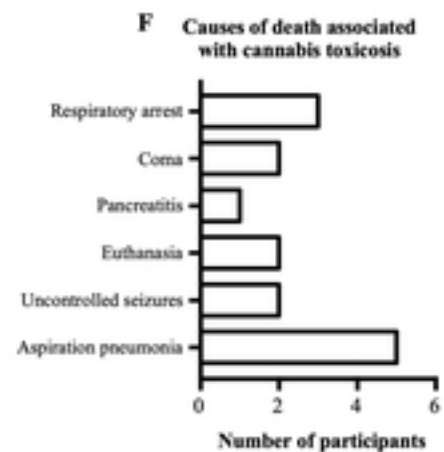

Source: https://www.biorxiv.org/content/10.1101/2021.12.14.472663v1.full.pdf
